# Supplementary material for: Prevention of surface-induced thrombogenesis on poly(vinyl chloride)
Source: Royal Society of Chemistry journal article supplement (doi:10.1039/c5tb01582k), 2015-01-01
Supplement: c5tb01582k1.pdf [file c5tb01582k1.pdf]

SUPPLEMENTARY INFORMATION

# Prevention of surface-induced thrombogenesis on poly(vinyl chloride)

Kiril Fedorov,<sup>a</sup> Alexander Jankowski,<sup>b</sup> Sonia Sheikh,<sup>b</sup> Christophe Blaszykowski,<sup>c</sup>  
Adili Rehemani,<sup>d</sup> Alexander Romaschin,<sup>e</sup> Heyu Ni,<sup>d</sup> and Michael Thompson<sup>\*,a,b,c</sup>

<sup>a</sup> *Institute of Biomaterials & Biomedical Engineering, University of Toronto, 164 College Street, Toronto, Ontario M5S 3G9, Canada*

<sup>b</sup> *Department of Chemistry – St. George Campus, University of Toronto, 80 St. George Street, Toronto, Ontario M5S 3H6, Canada*

<sup>c</sup> *Econous Systems Inc., 80 St. George Street, Toronto, Ontario M5S 3H6, Canada*

<sup>d</sup> *Canadian Blood Services and the Department of Laboratory Medicine and Pathobiology, Keenan Research Centre in the Li Ka Shing Knowledge Institute of St. Michael's Hospital, University of Toronto, 30 Bond Street, Toronto, Ontario M5B 1W8, Canada*

<sup>e</sup> *Keenan Research Centre and Clinical Biochemistry, St. Michael's Hospital, 30 Bond Street, Toronto, Ontario M5B 1W8, Canada*

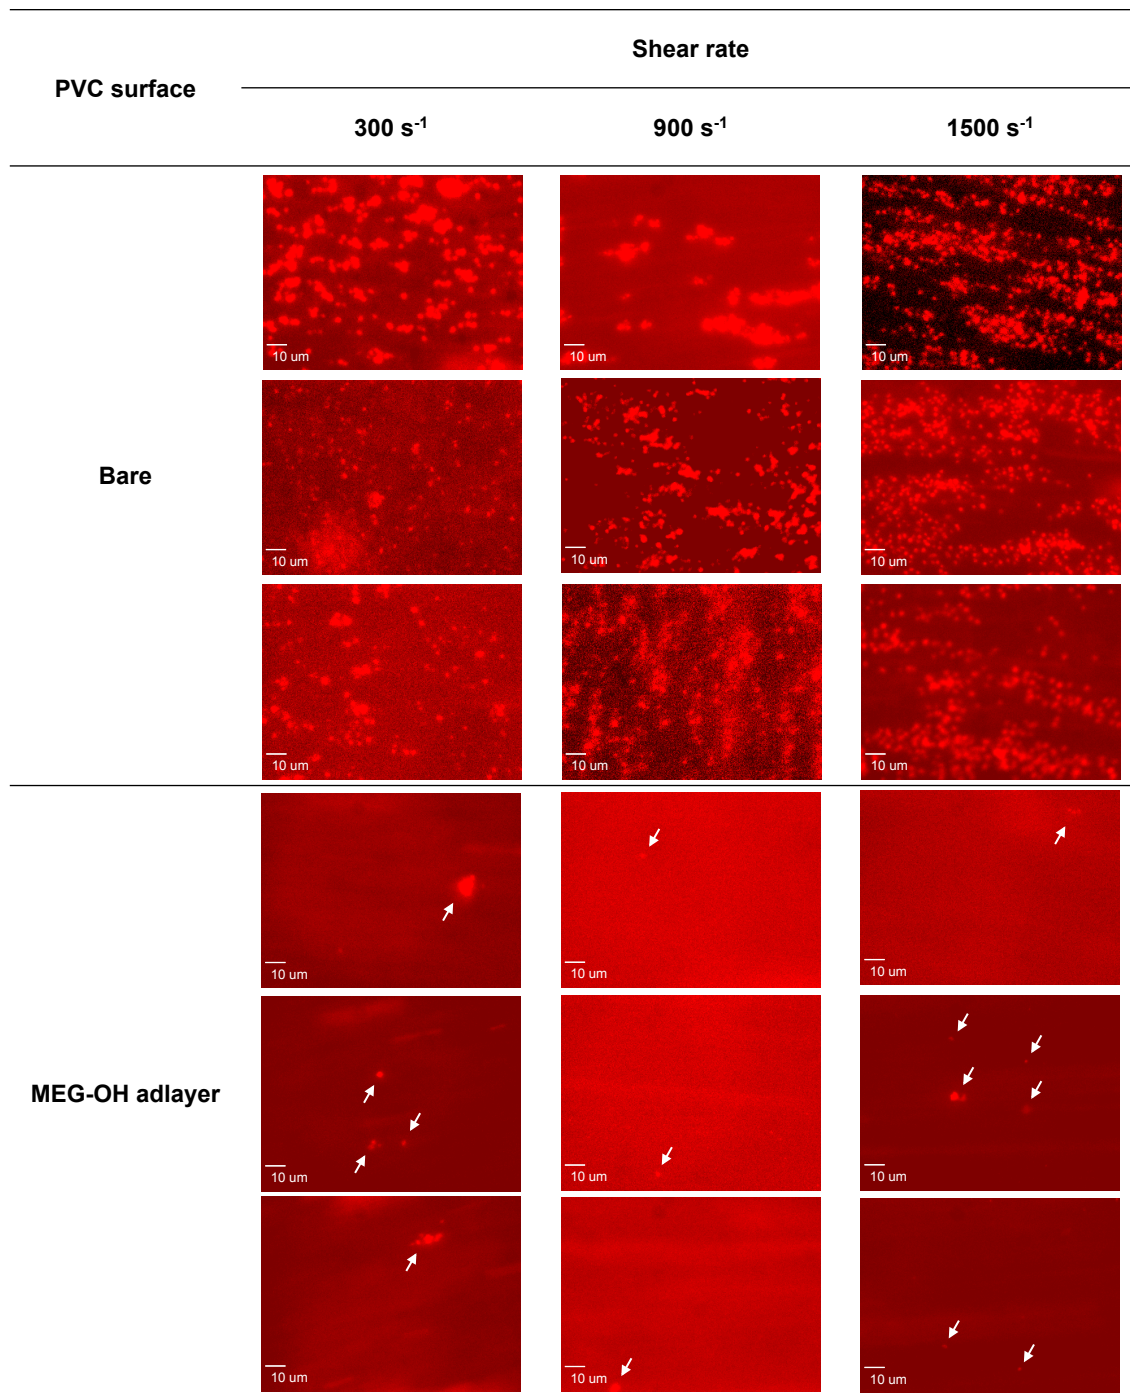

**Fig. S11** Replicate pictures of platelet adhesion, aggregation and thrombus formation on (top) bare, and (bottom) MEG-OH adlayer-derivatized PVC substrates upon 10 min exposure to whole, fluorescently-labelled human blood – at (left) 300, (middle) 900, and (right) 1500 s<sup>-1</sup> controlled shear rates.
